# Supplementary material
Source: PubMed Central journal article supplement (PMC3484507)
Supplement: mmc1.pdf [file mmc1.pdf]

## Supplemental Data

### Nonsense Mutations in *AAGAB*

### Cause Punctate Palmoplantar Keratoderma

### Type Buschke-Fischer-Brauer

Kathrin A. Giehl, Gertrud N. Eckstein, Sandra M. Pasternack, Silke Praetzel-Wunder, Thomas Ruzicka, Peter Lichtner, Kerstin Seidl, Mike Rogers, Elisabeth Graf, Lutz Langbein, Markus Braun-Falco, Regina C. Betz, and Tim M. Strom

## Material and Methods

### *Standard Procedure for Indirect Immunofluorescence Microscopy*

After briefly rinsing in PBS, cryostat sections were fixed in acetone (-20°C; 5min), blocked with 5% normal goat serum in phosphate-buffered saline (PBST; PBS + 0.001% Triton-X100). Primary antibodies were applied for 1h and after rinsing in PBS, incubation with secondary antibodies were done for 30min. After washing in PBS, sections were dried and mounted. To prevent possible losses of soluble antigens i.e. transcription factors during the immunolocalization procedures using sections of frozen tissues, different fixation and incubation protocols were used (protocols 2 and 3)<sup>1</sup>. Briefly, cryosections were very shortly rinsed in PBS, supplemented with 2mM MgCl<sub>2</sub> and following deviations were applied: Instead of PBST only PBS was used and all antibody incubation steps were shortened to 15 min and the washing steps to 3 min under shaking ("short protocol") or the initial fixation was done in freshly prepared phosphate-buffered 2% formaldehyde in PBS, 15 min, RT, followed by rinsing in PBS, blocking in 50 mM NH<sub>4</sub>Cl (freshly prepared, 10 min, RT), rinsing in PBST ("formaldehyde protocol").<sup>1</sup> Thereafter the standard procedure was followed.

Immunofluorescence was documented with a Zeiss AxioPhot microscope equipped with an AxioCam MRm camera and AxioVision imaging software (Carl Zeiss Oberkochen/ Jena, Germany).

### *Antibodies*

Specific antibodies against human *AAGAB* were: Purified mouse polyclonal antibodies (FLJ11506; Catalog: H00079710- B01P; dilution 1:20; Abnova, Taipei, Taiwan), rabbit polyclonal antibodies (FLJ11506; Catalog: NBP1-87905; dilution 1:50) and (FLJ11506; catalog: NBP1-87906; dilution 1:100; both from Novus Biologicals, Cambridge, UK). For positive control of tissue antigenicity, anti-human Keratin K1 made in guinea pigs (diluted 1:2000; DKFZ by L.L.) was used. Secondary antibodies (IgG or IgG+IgM) used for IIF were: Goat anti-rabbit-, anti-guinea pig, -anti-mouse, coupled to Cy3 (1:500, red fluorescence, Molecular Probes).

The *AAGAB* antisera were partially characterized for specificity by the providers mainly by Western blotting, but little was known for *AAGAB* immunohistochemical staining

procedures. We therefore tested all sera for appropriate dilutions and fixation procedures. As our standard fixation procedure including permeabilization of cells, was not successful we used a previously described protocol for soluble materials (see supplement).<sup>1-2</sup> Formaldehyde fixation gave the best results and was used throughout the study.

## References

1. Langbein, L., Spring, H., Rogers, M.A., Praetzel, S., Schweizer, J. (2004). Hair keratins and hair follicle-specific epithelial keratins. *Methods in Cell Biology*, 78, 413-451.
2. Schmidt, A., Langbein, L., Rode, M., Praetzel, S., Zimbelmann, R., Franke, W.W. (1997). Plakophilins 1a and 1b: widespread nuclear proteins recruited in specific epithelial cells as desmosomal plaque components. *Cell Tiss. Res.* 290, 481-499.

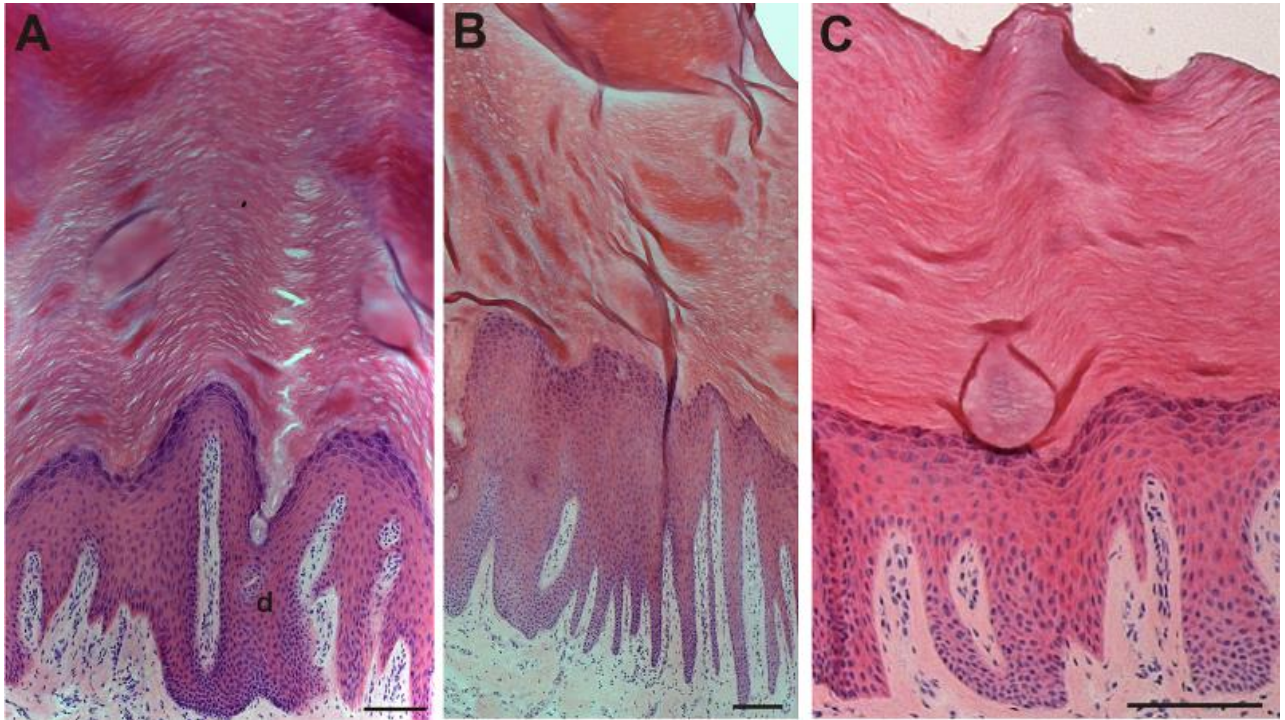

**Figure S1. HE Staining of Normal and Affected Footsole Epidermis**

(A) Normal footsole (control) skin. d, eccrine sweat gland duct.

(B and C) Sole skin of an affected individual in the affected and (C) unaffected area. The affected skin (B) is much higher stratified including an enlarged stratum corneum when compared with the unaffected (C) area. The upper part of the stratum corneum was generally folded due to the extreme hyperkeratosis of pathogenetic affected skin sections.

Bars: 200  $\mu$ m.

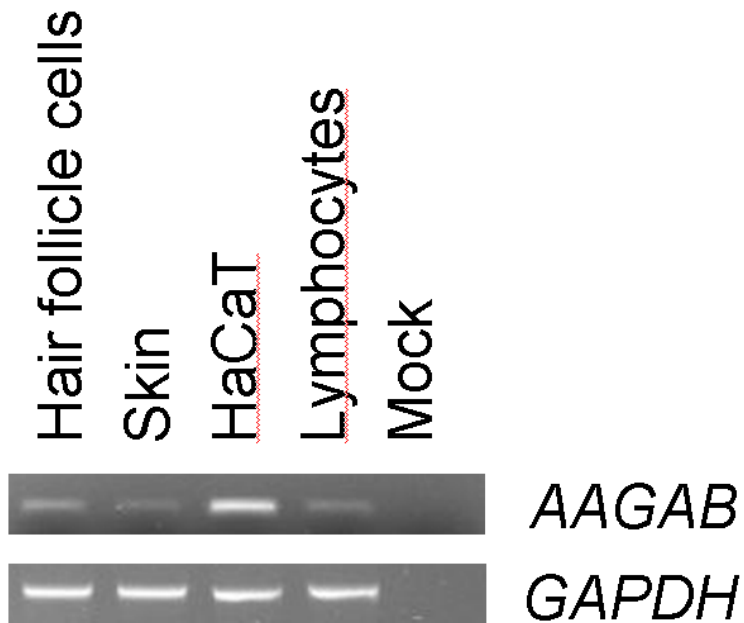

**Figure S2. Expression Analysis in Human Tissues**

Expression of *AAGAB* and *GAPDH* in various normal human tissues and cells. RT-PCR analysis was performed from skin tissue, hair follicle cells, an immortalized keratinocyte cell line (HaCaT cells) and lymphocytes. The last lane—mock—is a negative (no template) control. *AAGAB* is expressed in all investigated tissues.

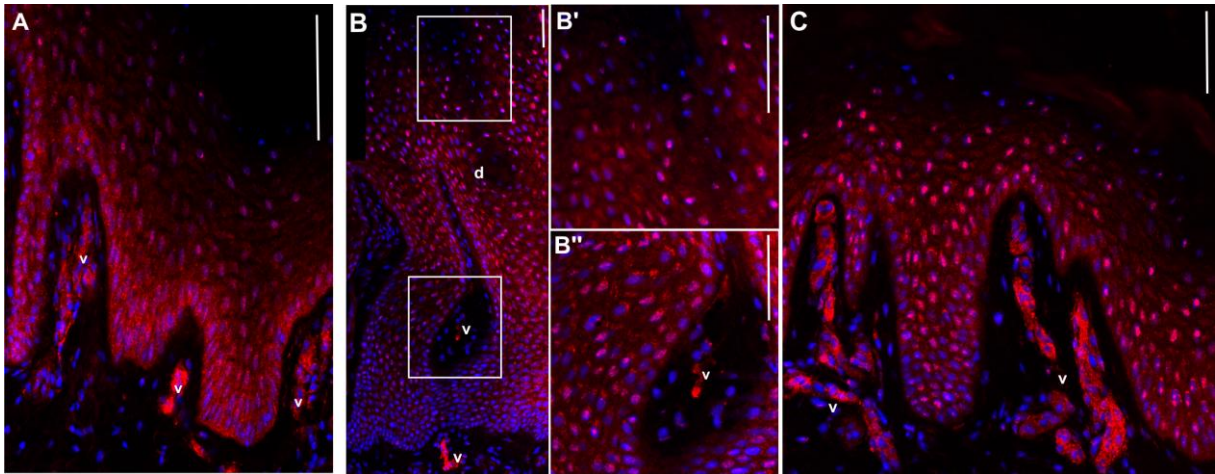

**Figure S3. Immunofluorescence Staining of AAGAB in Normal and Affected Skin**

(A) Normal control sole skin.

(B–B'' and C) Sole skin of an affected individual in the affected (B–B'') and unaffected (C) area. Upper and lower rectangles in (B) and (C) demarcate higher magnifications in B'/B'' respectively. v, dermal blood vessels; d, eccrine sweat gland ducts.

Bars: 100  $\mu$ m in A, B, and C; 15  $\mu$ m in B' and B''.

**Table S1. Disease Haplotypes of Families B and C in Chromosomal Region 15q22.31-15q23**

| Name           | Genetic Position | Physical Position | Pedigree B | Pedigree C | SNP   |
|----------------|------------------|-------------------|------------|------------|-------|
| SNP15-67469128 | 73.1             | 67469128          | C          | A          | [A/C] |
| SNP15-67469568 | 73.1             | 67469568          | A          | G          | [A/G] |
| SNP15-67470208 | 73.1             | 67470208          | T          | T          | [T/C] |
| SNP15-67471268 | 73.1             | 67471268          | T          | T          | [T/C] |
| SNP15-67475083 | 73.1             | 67475083          | G          | G          | [A/G] |
| SNP15-67476768 | 73.1             | 67476768          | G          | G          | [A/G] |
| rs7173811      | 73.1             | 67479051          | T          | T          | [T/C] |
| SNP15-67480480 | 73.1             | 67480480          | C          | C          | [T/C] |
| SNP15-67480969 | 73.1             | 67480969          | G          | G          | [A/G] |
| SNP15-67481514 | 73.1             | 67481514          | C          | C          | [T/C] |
| rs8025774      | 73.1             | 67483276          | C          | C          | [T/C] |
| rs8031440      | 73.1             | 67483979          | C          | C          | [T/C] |
| rs8031627      | 73.1             | 67484119          | C          | C          | [T/C] |
| SNP15-67485101 | 73.1             | 67485101          | G          | G          | [A/G] |
| rs12595334     | 73.1             | 67485156          | G          | G          | [A/G] |
| rs3743342      | 73.1             | 67485667          | G          | G          | [A/G] |
| SNP15-67486078 | 73.1             | 67486078          | C          | C          | [T/C] |
| rs12900401     | 73.1             | 67486590          | G          | G          | [A/G] |
| rs3743343      | 73.1             | 67486775          | C          | C          | [T/C] |
| rs1052488      | 73.1             | 67486847          | G          | G          | [A/G] |
| SNP15-67492301 | 73.1             | 67492301          | T          | T          | [T/C] |
| rs12476        | 73.1             | 67493726          | A          | A          | [A/G] |
| SNP15-67494304 | 73.1             | 67494304          | G          | G          | [T/G] |
| rs1050285      | 73.1             | 67494494          | T          | T          | [T/C] |
| SNP15-67494922 | 73.1             | 67494922          | T          | T          | [T/C] |
| SNP15-67498855 | 73.1             | 67498855          | C          | C          | [T/C] |
| SNP15-67500330 | 73.1             | 67500330          | T          | T          | [T/C] |
| SNP15-67501592 | 73.1             | 67501592          | C          | C          | [T/C] |
| SNP15-67501782 | 73.1             | 67501782          | G          | G          | [A/G] |
| SNP15-67502572 | 73.1             | 67502572          | A          | A          | [A/G] |
| SNP15-67503637 | 73.1             | 67503637          | G          | G          | [A/G] |
| rs7169664      | 73.1             | 67505066          | G          | G          | [A/G] |
| rs7173826      | 73.1             | 67528374          | A          | A          | [A/C] |
| rs11071943     | 73.1             | 67535996          | A          | A          | [A/C] |
| rs12911370     | 73.1             | 67546321          | G          | G          | [A/G] |
| SNP15-67548688 | 73.1             | 67548688          | A          | A          | [A/G] |
| SNP15-67548840 | 73.1             | 67548840          | C          | C          | [T/C] |
| SNP15-67549800 | 73.1             | 67549800          | A          | A          | [A/C] |
| SNP15-67552064 | 73.1             | 67552064          | G          | G          | [A/G] |
| SNP15-67555037 | 73.1             | 67555037          | A          | A          | [A/G] |
| SNP15-67555487 | 73.1             | 67555487          | C          | C          | [C/G] |
| SNP15-67555958 | 73.1             | 67555958          | G          | G          | [A/G] |
| SNP15-67558010 | 73.1             | 67558010          | G          | G          | [T/G] |
| SNP15-67561598 | 73.1             | 67561598          | G          | G          | [A/G] |
| rs8029582      | 73.1             | 67575545          | C          | C          | [A/C] |
| SNP15-67587368 | 73.1             | 67587368          | T          | T          | [T/C] |

| <b>Name</b>    | <b>Genetic Position</b> | <b>Physical Position</b> | <b>Pedigree B</b> | <b>Pedigree C</b> | <b>SNP</b> |
|----------------|-------------------------|--------------------------|-------------------|-------------------|------------|
| SNP15-67599975 | 73.1                    | 67599975                 | G                 | G                 | [A/G]      |
| SNP15-67602464 | 73.1                    | 67602464                 | C                 | C                 | [T/C]      |
| rs11635391     | 73.1                    | 67607900                 | A                 | A                 | [A/G]      |
| rs7170004      | 73.1                    | 67611732                 | T                 | T                 | [T/C]      |
| SNP15-67614178 | 73.1                    | 67614178                 | A                 | A                 | [A/C]      |
| rs8032438      | 73.1                    | 67615953                 | G                 | G                 | [A/G]      |
| SNP15-67628649 | 73.1                    | 67628649                 | G                 | G                 | [A/G]      |
| rs956129       | 73.1                    | 67629175                 | G                 | G                 | [A/G]      |
| SNP15-67630587 | 73.1                    | 67630587                 | C                 | C                 | [T/C]      |
| SNP15-67632482 | 73.1                    | 67632482                 | G                 | G                 | [A/G]      |
| SNP15-67645243 | 73.1                    | 67645243                 | T                 | T                 | [T/C]      |
| rs10152973     | 73.1                    | 67647218                 | A                 | A                 | [A/G]      |
| SNP15-67648216 | 73.1                    | 67648216                 | C                 | C                 | [T/C]      |
| SNP15-67650155 | 73.1                    | 67650155                 | T                 | T                 | [T/C]      |
| rs4496076      | 73.1                    | 67654369                 | G                 | G                 | [A/G]      |
| SNP15-67663250 | 73.1                    | 67663250                 | A                 | A                 | [A/G]      |
| SNP15-67663284 | 73.1                    | 67663284                 | A                 | A                 | [A/G]      |
| SNP15-67664137 | 73.1                    | 67664137                 | A                 | A                 | [A/G]      |
| SNP15-67670535 | 73.1                    | 67670535                 | C                 | C                 | [T/C]      |
| SNP15-67680789 | 73.1                    | 67680789                 | G                 | G                 | [T/G]      |
| rs6494654      | 73.1                    | 67681907                 | A                 | A                 | [A/G]      |
| SNP15-67693890 | 73.1                    | 67693890                 | A                 | A                 | [A/G]      |
| rs950784       | 73.1                    | 67697023                 | T                 | T                 | [T/C]      |
| rs2286664      | 73.1                    | 67701495                 | T                 | T                 | [T/C]      |
| SNP15-67707134 | 73.1                    | 67707134                 | C                 | C                 | [C/G]      |
| SNP15-67710011 | 73.1                    | 67710011                 | G                 | G                 | [A/G]      |
| rs12148151     | 73.1                    | 67715476                 | A                 | A                 | [A/G]      |
| SNP15-67716497 | 73.1                    | 67716497                 | T                 | T                 | [T/G]      |
| rs4423371      | 73.1                    | 67720855                 | G                 | G                 | [A/G]      |
| SNP15-67725897 | 73.1                    | 67725897                 | T                 | T                 | [T/C]      |
| rs2899723      | 73.1                    | 67736023                 | C                 | C                 | [T/C]      |
| SNP15-67749871 | 73.1                    | 67749871                 | A                 | A                 | [A/C]      |
| SNP15-67753967 | 73.1                    | 67753967                 | C                 | C                 | [T/C]      |
| rs8038138      | 73.1                    | 67756572                 | G                 | G                 | [A/G]      |
| SNP15-67756899 | 73.1                    | 67756899                 | A                 | A                 | [A/G]      |
| SNP15-67760478 | 73.1                    | 67760478                 | C                 | C                 | [T/C]      |
| rs2899724      | 73.1                    | 67760808                 | A                 | A                 | [A/G]      |
| rs16950932     | 73.1                    | 67761862                 | A                 | A                 | [A/G]      |
| rs4776361      | 73.1                    | 67762056                 | G                 | G                 | [A/G]      |
| SNP15-67765450 | 73.1                    | 67765450                 | A                 | A                 | [A/C]      |
| rs12591605     | 73.1                    | 67766364                 | G                 | G                 | [A/G]      |
| SNP15-67770306 | 73.1                    | 67770306                 | G                 | G                 | [T/G]      |
| SNP15-67774033 | 73.1                    | 67774033                 | G                 | G                 | [A/G]      |
| SNP15-67784487 | 73.1                    | 67784487                 | G                 | G                 | [A/G]      |
| rs4278695      | 73.1                    | 67787064                 | T                 | T                 | [T/C]      |
| SNP15-67799130 | 73.1355                 | 67799130                 | G                 | G                 | [A/G]      |
| rs8034239      | 73.1543                 | 67803542                 | G                 | G                 | [A/G]      |
| SNP15-67804502 | 73.1584                 | 67804502                 | G                 | G                 | [A/G]      |

| Name           | Genetic Position | Physical Position | Pedigree B | Pedigree C | SNP   |
|----------------|------------------|-------------------|------------|------------|-------|
| SNP15-67806327 | 73.1661          | 67806327          | G          | G          | [A/G] |
| SNP15-67813371 | 73.1961          | 67813371          | C          | C          | [T/C] |
| rs8027115      | 73.2206          | 67819115          | C          | C          | [T/C] |
| SNP15-67821056 | 73.2289          | 67821056          | A          | A          | [A/G] |
| SNP15-67827705 | 73.2572          | 67827705          | C          | C          | [T/C] |
| SNP15-67835370 | 73.2899          | 67835370          | A          | A          | [A/G] |
| SNP15-67837009 | 73.2969          | 67837009          | C          | C          | [T/C] |
| rs6494670      | 73.3204          | 67842526          | G          | G          | [A/G] |
| SNP15-67845930 | 73.3349          | 67845930          | C          | C          | [T/C] |
| SNP15-67850566 | 73.3547          | 67850566          | G          | G          | [A/G] |
| rs11632574     | 73.3625          | 67852405          | C          | C,A        | [A/C] |
| rs11632776     | 73.3635          | 67852645          | T          | T          | [T/C] |
| SNP15-67863235 | 73.4086          | 67863235          | T          | T          | [T/C] |
| rs11638507     | 73.4547          | 67874045          | G          | G          | [A/G] |
| SNP15-67881637 | 73.487           | 67881637          | G          | G          | [A/G] |
| rs10851775     | 73.5071          | 67886351          | A          | A          | [A/G] |
| SNP15-67892792 | 73.5346          | 67892792          | C          | C          | [T/C] |
| SNP15-67892994 | 73.5354          | 67892994          | C          | C          | [T/C] |
| SNP15-67900883 | 73.5691          | 67900883          | C          | C          | [T/C] |
| rs12593494     | 73.5718          | 67901532          | A          | A          | [A/G] |
| rs2899726      | 73.5949          | 67906954          | A          | A          | [A/G] |
| rs9672402      | 73.6056          | 67909473          | G          | G          | [A/G] |
| rs11636945     | 73.6231          | 67913574          | G          | G          | [A/G] |
| rs12905544     | 73.6738          | 67925452          | A          | A          | [A/G] |
| SNP15-67929980 | 73.6931          | 67929980          | G          | G          | [A/G] |
| rs11631474     | 73.7109          | 67934167          | G          | G          | [A/G] |
| SNP15-67935745 | 73.7176          | 67935745          | C          | C          | [T/C] |
| rs11638739     | 73.7341          | 67939612          | A          | A          | [A/G] |
| SNP15-67942002 | 73.7443          | 67942002          | G          | G          | [A/G] |
| rs4776371      | 73.7562          | 67944799          | A          | A          | [A/G] |
| SNP15-67949040 | 73.7743          | 67949040          | C          | C          | [T/C] |
| rs16951105     | 73.8452          | 67965694          | A          | A          | [A/G] |
| SNP15-67969221 | 73.8603          | 67969221          | T          | T          | [T/G] |
| SNP15-67972908 | 73.876           | 67972908          | T          | T          | [T/C] |
| rs11637445     | 73.9557          | 67991606          | G          | G          | [T/G] |
| SNP15-67993166 | 73.9623          | 67993166          | A          | A          | [A/G] |
| rs11632828     | 73.9695          | 67994849          | G          | G          | [A/G] |
| SNP15-68002488 | 74.002           | 68002488          | C          | C          | [T/C] |
| SNP15-68012403 | 74.0443          | 68012403          | A          | A          | [T/C] |
| SNP15-68013079 | 74.0472          | 68013079          | G          | A,G        | [A/G] |
| rs997295       | 74.0611          | 68016343          | A          | A          | [A/C] |
| SNP15-68016955 | 74.0636          | 68016955          | A          | A          | [A/C] |
| rs3784700      | 74.0671          | 68017752          | A          | A          | [A/G] |
| rs10518740     | 74.0729          | 68019118          | C          | C          | [T/C] |
| SNP15-68019958 | 74.0765          | 68019958          | A          | A          | [A/G] |
| rs3784704      | 74.115           | 68028989          | A          | A          | [A/G] |
| rs12905397     | 74.1369          | 68034150          | G          | G          | [A/G] |
| rs12593813     | 74.1484          | 68036852          | G          | G          | [A/G] |



| <b>Name</b>    | <b>Genetic Position</b> | <b>Physical Position</b> | <b>Pedigree B</b> | <b>Pedigree C</b> | <b>SNP</b> |
|----------------|-------------------------|--------------------------|-------------------|-------------------|------------|
| rs11635424     | 74.1515                 | 68037578                 | C                 | C                 | [T/C]      |
| rs7177848      | 74.1674                 | 68041299                 | C                 | C                 | [T/C]      |
| rs16951227     | 74.1765                 | 68043433                 | A                 | A                 | [A/G]      |
| SNP15-68045430 | 74.185                  | 68045430                 | G                 | G                 | [A/G]      |
| SNP15-68046528 | 74.1897                 | 68046528                 | G                 | G                 | [A/G]      |
| rs8042507      | 74.2001                 | 68048974                 | A                 | A                 | [A/C]      |
| rs7183639      | 74.2078                 | 68050777                 | G                 | G                 | [A/G]      |
| SNP15-68051608 | 74.2113                 | 68051608                 | G                 | G                 | [A/G]      |
| rs884202       | 74.2232                 | 68054388                 | A                 | A                 | [A/G]      |
| SNP15-68055570 | 74.2282                 | 68055570                 | G                 | G                 | [A/G]      |
| SNP15-68056480 | 74.2321                 | 68056480                 | G                 | G                 | [T/G]      |
| rs11071959     | 74.2424                 | 68058903                 | G                 | G                 | [A/G]      |
| rs745212       | 74.2478                 | 68060179                 | A                 | A                 | [A/G]      |
| rs10518744     | 74.2598                 | 68062975                 | C                 | C                 | [T/C]      |
| SNP15-68063546 | 74.2622                 | 68063546                 | G                 | G                 | [A/G]      |
| rs4489954      | 74.2985                 | 68072075                 | C                 | C                 | [A/C]      |
| rs3784709      | 74.2994                 | 68072275                 | G                 | G                 | [A/G]      |
| rs3784711      | 74.3005                 | 68072527                 | C                 | C                 | [T/C]      |
| rs4261478      | 74.3071                 | 68074084                 | C                 | C                 | [T/C]      |
| SNP15-68075975 | 74.3152                 | 68075975                 | C                 | C                 | [T/C]      |
| rs12902904     | 74.3176                 | 68076533                 | T                 | T                 | [T/C]      |
| SNP15-68079358 | 74.3296                 | 68079358                 | G                 | G                 | [A/G]      |
| SNP15-68083436 | 74.347                  | 68083436                 | T                 | T                 | [T/G]      |
| rs3784716      | 74.3513                 | 68084450                 | A                 | A                 | [A/C]      |
| rs2241423      | 74.3615                 | 68086838                 | C                 | C                 | [T/C]      |
| rs16951304     | 74.3733                 | 68089618                 | A                 | A                 | [A/G]      |
| rs11635396     | 74.3767                 | 68090423                 | A                 | A                 | [A/G]      |
| rs2127162      | 74.3784                 | 68090824                 | T                 | T                 | [T/G]      |
| rs1026732      | 74.3966                 | 68095085                 | C                 | C                 | [T/C]      |
| rs13329413     | 74.4053                 | 68097126                 | C                 | C                 | [T/C]      |
| SNP15-68098936 | 74.413                  | 68098936                 | G                 | G                 | [A/G]      |
| SNP15-68100330 | 74.4189                 | 68100330                 | G                 | G                 | [T/G]      |
| rs16951319     | 74.433                  | 68103632                 | G                 | G                 | [A/G]      |
| SNP15-68103695 | 74.4333                 | 68103695                 | C                 | C                 | [T/C]      |
| rs7180312      | 74.4399                 | 68105256                 | G                 | G                 | [A/G]      |
| SNP15-68105878 | 74.4426                 | 68105878                 | T                 | T                 | [T/C]      |
| SNP15-68109907 | 74.4597                 | 68109907                 | T                 | T                 | [T/C]      |
| rs2061845      | 74.4698                 | 68112274                 | G                 | G                 | [A/G]      |
| rs4776982      | 74.4814                 | 68114974                 | A                 | A                 | [A/G]      |
| SNP15-68116400 | 74.4874                 | 68116400                 | G                 | G                 | [T/G]      |
| SNP15-68123582 | 74.518                  | 68123582                 | G                 | G                 | [A/G]      |
| SNP15-68124665 | 74.5226                 | 68124665                 | C                 | C                 | [A/C]      |
| rs3803522      | 74.5312                 | 68126675                 | G                 | G                 | [A/G]      |
| SNP15-68127773 | 74.5359                 | 68127773                 | G                 | G                 | [A/G]      |
| SNP15-68129127 | 74.5417                 | 68129127                 | G                 | G                 | [T/G]      |
| SNP15-68129326 | 74.5425                 | 68129326                 | T                 | T                 | [T/G]      |
| rs7497457      | 74.557                  | 68132723                 | T                 | T                 | [T/G]      |
| SNP15-68133617 | 74.5608                 | 68133617                 | T                 | T                 | [T/C]      |

| Name           | Genetic Position | Physical Position | Pedigree B | Pedigree C | SNP   |
|----------------|------------------|-------------------|------------|------------|-------|
| rs12907778     | 74.5668          | 68135027          | A          | A          | [A/G] |
| rs16951344     | 74.5788          | 68137843          | A          | A          | [A/C] |
| rs4776991      | 74.5887          | 68140162          | A          | A          | [A/G] |
| SNP15-68140610 | 74.5906          | 68140610          | A          | A          | [A/G] |
| SNP15-68141566 | 74.5947          | 68141566          | C          | C          | [A/C] |
| SNP15-68143288 | 74.602           | 68143288          | C          | C          | [T/C] |
| rs11637396     | 74.6065          | 68144345          | C          | C          | [T/C] |
| SNP15-68144825 | 74.6085          | 68144825          | T          | T          | [T/C] |
| rs12905141     | 74.6167          | 68146731          | C          | C          | [T/C] |
| rs12592776     | 74.6239          | 68148432          | G          | G          | [T/G] |
| rs1001870      | 74.6368          | 68151448          | T          | T          | [T/C] |
| SNP15-68152190 | 74.6399          | 68152190          | G          | A,G        | [A/G] |
| SNP15-68152198 | 74.64            | 68152198          | C          | A,C        | [T/C] |
| SNP15-68155644 | 74.6547          | 68155644          | C          | C          | [T/C] |
| rs4776381      | 74.6549          | 68155710          | A          | A          | [A/G] |
| rs1982647      | 74.6564          | 68156055          | A          | A          | [A/G] |
| rs4306451      | 74.6642          | 68157881          | G          | G          | [A/G] |
| SNP15-68162131 | 74.6823          | 68162131          | T          | T          | [T/C] |
| SNP15-68166930 | 74.7027          | 68166930          | A          | A          | [A/G] |
| rs8037951      | 74.7378          | 68175157          | A          | A          | [A/C] |
| SNP15-68176397 | 74.7431          | 68176397          | C          | C          | [T/C] |
| SNP15-68177714 | 74.7487          | 68177714          | C          | A,C        | [T/C] |
| SNP15-68180081 | 74.7588          | 68180081          | C          | C          | [T/C] |
| SNP15-68180471 | 74.7605          | 68180471          | G          | G          | [A/G] |
| rs1996120      | 74.765           | 68181534          | A          | A          | [A/G] |
| SNP15-68183005 | 74.7713          | 68183005          | T          | T          | [T/C] |
| SNP15-68186641 | 74.7867          | 68186641          | G          | G          | [A/G] |
| rs8032153      | 74.8225          | 68195035          | A          | A          | [A/G] |
| SNP15-68198140 | 74.8358          | 68198140          | G          | G          | [A/G] |
| rs430610       | 74.8378          | 68198622          | T          | T          | [T/C] |
| SNP15-68198741 | 74.8383          | 68198741          | C          | C          | [T/C] |
| SNP15-68202649 | 74.855           | 68202649          | G          | T,G        | [T/G] |
| SNP15-68204357 | 74.8622          | 68204357          | C          | C          | [A/C] |
| SNP15-68207015 | 74.8736          | 68207015          | T          | T          | [T/C] |
| SNP15-68207020 | 74.8736          | 68207020          | A          | G,A        | [A/G] |
| SNP15-68211991 | 74.8948          | 68211991          | C          | C          | [T/C] |
| rs338369       | 74.9088          | 68215300          | C          | C          | [A/C] |
| rs338372       | 74.9185          | 68217562          | G          | G          | [A/G] |
| SNP15-68217809 | 74.9196          | 68217809          | C          | C          | [T/C] |
| rs11633495     | 74.9243          | 68218922          | G          | A,G        | [A/G] |
| rs16951479     | 74.9245          | 68218974          | C          | A,C        | [A/C] |
| SNP15-68219974 | 74.9288          | 68219974          | T          | T          | [T/C] |
| SNP15-68220072 | 74.9292          | 68220072          | C          | C          | [A/C] |
| rs396174       | 74.9335          | 68221078          | A          | A          | [A/G] |
| rs2448134      | 74.9419          | 68223040          | C          | C          | [T/C] |
| SNP15-68225244 | 74.9513          | 68225244          | C          | T,C        | [T/C] |
| SNP15-68227960 | 74.9628          | 68227960          | A          | A          | [A/G] |
| SNP15-68227985 | 74.9629          | 68227985          | T          | T          | [T/C] |

| Name           | Genetic Position | Physical Position | Pedigree B | Pedigree C | SNP   |
|----------------|------------------|-------------------|------------|------------|-------|
| rs338350       | 74.9675          | 68229052          | C          | C          | [T/C] |
| SNP15-68232499 | 74.9821          | 68232499          | T          | T          | [T/G] |
| rs1564277      | 74.988           | 68233869          | C          | C          | [T/C] |
| rs11636387     | 74.992           | 68234818          | T          | T          | [T/C] |
| SNP15-68235621 | 74.9955          | 68235621          | G          | G          | [A/G] |
| rs44410        | 74.9956          | 68235646          | A          | A          | [A/G] |
| SNP15-68236286 | 74.9983          | 68236286          | T          | T          | [T/C] |
| SNP15-68240825 | 75.0176          | 68240825          | T          | G,T        | [T/G] |
| rs12439223     | 75.0207          | 68241646          | T          | T          | [T/C] |
| SNP15-68242193 | 75.0221          | 68242193          | C          | C          | [T/C] |
| rs8036635      | 75.0308          | 68245488          | A          | C,A        | [A/C] |
| SNP15-68245930 | 75.032           | 68245930          | A          | T,A        | [A/T] |
| rs12902929     | 75.0356          | 68247308          | C          | A,C        | [A/C] |
| SNP15-68249135 | 75.0404          | 68249135          | G          | G          | [A/G] |
| SNP15-68250076 | 75.0429          | 68250076          | C          | C          | [A/C] |
| SNP15-68253238 | 75.0512          | 68253238          | A          | G,A        | [A/G] |
| SNP15-68254156 | 75.0536          | 68254156          | A          | A          | [A/G] |
| SNP15-68254367 | 75.0542          | 68254367          | T          | G,T        | [T/G] |
| rs16951524     | 75.0546          | 68254541          | C          | T,C        | [T/C] |
| SNP15-68254591 | 75.0548          | 68254591          | A          | A,G        | [A/G] |
| rs338389       | 75.069           | 68260008          | G          | A,G        | [A/G] |
| rs10851782     | 75.0823          | 68265049          | A          | A          | [A/G] |
| rs338344       | 75.0963          | 68270380          | T          | T          | [T/C] |
| rs338342       | 75.1007          | 68272052          | G          | G          | [A/G] |
| SNP15-68273986 | 75.1058          | 68273986          | T          | T,C        | [T/C] |
| SNP15-68274789 | 75.1079          | 68274789          | T          | C,T        | [T/C] |
| SNP15-68276343 | 75.112           | 68276343          | C          | C          | [T/C] |
| rs8037902      | 75.1234          | 68280703          | A          | A          | [A/G] |
| SNP15-68281008 | 75.1242          | 68281008          | G          | G          | [A/G] |
| SNP15-68282153 | 75.1272          | 68282153          | A          | A          | [T/A] |
| SNP15-68285356 | 75.1357          | 68285356          | A          | A          | [A/G] |
| SNP15-68285578 | 75.1362          | 68285578          | G          | G          | [A/G] |
| SNP15-68288459 | 75.1438          | 68288459          | C          | C          | [T/C] |
| rs7163804      | 75.1504          | 68290946          | A          | A          | [A/C] |
| rs6494709      | 75.1584          | 68294010          | G          | G          | [A/G] |
| rs1532113      | 75.16            | 68294598          | C          | C          | [T/C] |
| SNP15-68296888 | 75.166           | 68296888          | A          | A          | [A/G] |
| rs16951552     | 75.1798          | 68302144          | C          | C          | [T/C] |
| SNP15-68305370 | 75.1883          | 68305370          | A          | A          | [A/G] |
| rs11071974     | 75.1911          | 68306447          | G          | G          | [A/G] |
| SNP15-68307970 | 75.1951          | 68307970          | A          | A          | [A/G] |
| rs4777016      | 75.2134          | 68314919          | C          | C          | [T/C] |
| SNP15-68317407 | 75.22            | 68317407          | A          | A          | [A/G] |
| rs16951597     | 75.2321          | 68322007          | G          | G          | [A/G] |
| rs12593922     | 75.2424          | 68325938          | A          | A          | [A/G] |
| SNP15-68329025 | 75.2505          | 68329025          | A          | A          | [A/G] |
| SNP15-68330375 | 75.2541          | 68330375          | G          | G          | [A/G] |
| SNP15-68338706 | 75.276           | 68338706          | G          | A,G        | [A/G] |

| Name           | Genetic Position | Physical Position | Pedigree B | Pedigree C | SNP   |
|----------------|------------------|-------------------|------------|------------|-------|
| rs1489598      | 75.3054          | 68349893          | G          | G          | [A/G] |
| SNP15-68351048 | 75.3084          | 68351048          | C          | C          | [A/C] |
| SNP15-68373638 | 75.3678          | 68373638          | T          | T          | [T/C] |
| rs1489595      | 75.377           | 68377126          | T          | T          | [T/C] |
| SNP15-68381444 | 75.3884          | 68381444          | T          | T          | [T/C] |
| SNP15-68384227 | 75.3957          | 68384227          | C          | C          | [A/C] |
| rs8025474      | 75.4017          | 68386523          | G          | A,G        | [A/G] |
| SNP15-68392332 | 75.417           | 68392332          | G          | G          | [A/G] |
| rs4306484      | 75.4276          | 68396372          | G          | G          | [A/G] |
| rs11856619     | 75.4486          | 68404362          | C          | C          | [T/C] |
| SNP15-68404831 | 75.4499          | 68404831          | A          | G,A        | [A/G] |
| SNP15-68417093 | 75.4821          | 68417093          | T          | T          | [T/C] |
| SNP15-68425635 | 75.5046          | 68425635          | A          | A          | [A/G] |
| SNP15-68432140 | 75.5217          | 68432140          | G          | G          | [A/G] |
| rs8035890      | 75.5348          | 68437102          | T          | T          | [T/G] |
| rs4777022      | 75.5425          | 68440028          | T          | T          | [T/C] |
| SNP15-68440466 | 75.5436          | 68440466          | G          | G          | [A/G] |
| SNP15-68440606 | 75.544           | 68440606          | C          | T,C        | [T/C] |
| SNP15-68445679 | 75.5573          | 68445679          | G          | G          | [A/G] |
| rs10152713     | 75.6262          | 68471891          | C          | C          | [T/C] |
| SNP15-68475424 | 75.6355          | 68475424          | T          | C,T        | [T/C] |
| rs1049493      | 75.6499          | 68480887          | A          | A          | [A/G] |
| SNP15-68486097 | 75.6636          | 68486097          | A          | A          | [A/G] |
| rs11071986     | 75.6792          | 68492028          | A          | A          | [A/G] |
| rs11071991     | 75.695           | 68498052          | C          | C          | [T/C] |
| rs8028241      | 75.6984          | 68499321          | G          | G          | [A/G] |
| SNP15-68499661 | 75.6993          | 68499661          | T          | T          | [T/C] |
| rs1400432      | 75.707           | 68502604          | A          | A          | [A/G] |
| SNP15-68503216 | 75.7086          | 68503216          | A          | A          | [A/G] |
| rs17317291     | 75.7523          | 68519814          | G          | G          | [T/G] |
| rs2169215      | 75.8024          | 68538856          | T          | T          | [T/C] |
| rs8038170      | 75.8136          | 68543128          | T          | T          | [T/C] |
| rs1554223      | 75.8201          | 68545603          | A          | A          | [A/G] |
| SNP15-68545798 | 75.8206          | 68545798          | A          | A          | [A/G] |
| SNP15-68546156 | 75.8216          | 68546156          | A          | A          | [A/G] |
| rs12902478     | 75.8259          | 68547828          | A          | A          | [A/G] |
| SNP15-68553914 | 75.842           | 68553914          | G          | T,G        | [T/G] |
| rs2280218      | 75.8764          | 68567012          | A          | A          | [A/C] |
| SNP15-68567752 | 75.8784          | 68567752          | C          | C          | [T/C] |
| rs16951723     | 75.8843          | 68570011          | C          | T,C        | [T/C] |
| SNP15-68570158 | 75.8847          | 68570158          | T          | T,G        | [T/G] |
| SNP15-68571164 | 75.8873          | 68571164          | C          | T,C        | [T/C] |
| rs10152450     | 75.8882          | 68571479          | A          | A,C        | [A/C] |
| SNP15-68578329 | 75.9062          | 68578329          | T          | T,G        | [T/G] |
| rs12909277     | 75.913           | 68580912          | G          | A,G        | [A/G] |
| rs10444850     | 75.9341          | 68588935          | C          | T,C        | [T/C] |
| SNP15-68594522 | 75.9488          | 68594522          | C          | T,C        | [T/C] |
| SNP15-68594861 | 75.9497          | 68594861          | G          | A,G        | [A/G] |

| Name           | Genetic Position | Physical Position | Pedigree B | Pedigree C | SNP   |
|----------------|------------------|-------------------|------------|------------|-------|
| SNP15-68595801 | 75.9521          | 68595801          | C          | T,C        | [T/C] |
| rs7174755      | 75.9556          | 68597127          | T          | T,C        | [T/C] |
| rs898590       | 75.9741          | 68604175          | C          | T,C        | [T/C] |
| SNP15-68605067 | 75.9765          | 68605067          | A          | A          | [A/C] |
| rs4777035      | 75.9768          | 68605169          | A          | A,G        | [A/G] |
| rs1125721      | 75.9807          | 68606656          | G          | G          | [A/G] |
| SNP15-68608187 | 75.9847          | 68608187          | A          | A          | [A/T] |
| SNP15-68611426 | 75.9932          | 68611426          | G          | G          | [T/C] |
| SNP15-68611489 | 75.9934          | 68611489          | C          | C          | [G/C] |
| SNP15-68612890 | 75.9971          | 68612890          | A          | A          | [A/C] |
| SNP15-68613778 | 75.9994          | 68613778          | G          | G          | [T/G] |
| rs3736493      | 75.9994          | 68613787          | T          | T          | [T/C] |
| SNP15-68614895 | 76.0023          | 68614895          | A          | A          | [A/G] |
| SNP15-68615422 | 76.0037          | 68615422          | A          | A          | [A/G] |
| rs2414997      | 76.004           | 68615519          | T          | T          | [T/C] |
| rs1516869      | 76.0049          | 68615873          | G          | G          | [A/G] |
| SNP15-68616678 | 76.007           | 68616678          | T          | T          | [T/C] |
| rs4777037      | 76.0161          | 68620136          | C          | C          | [A/C] |
| rs2292745      | 76.0271          | 68624290          | T          | T          | [T/C] |
| SNP15-68624396 | 76.0273          | 68624396          | C          | C          | [A/C] |
| SNP15-68625175 | 76.0294          | 68625175          | A          | A          | [A/G] |
| SNP15-68625456 | 76.0301          | 68625456          | T          | T          | [T/G] |
| rs964691       | 76.033           | 68626542          | G          | G          | [A/G] |
| rs2306024      | 76.0369          | 68628049          | A          | A          | [A/C] |
| rs2306023      | 76.0372          | 68628143          | T          | T          | [T/C] |
| rs898586       | 76.0384          | 68628601          | C          | C          | [T/C] |
| SNP15-68628636 | 76.0385          | 68628636          | A          | A          | [A/G] |
| rs898585       | 76.0394          | 68628999          | G          | G          | [A/G] |
| SNP15-68629763 | 76.0414          | 68629763          | C          | C          | [T/C] |
| SNP15-68630204 | 76.0426          | 68630204          | T          | T          | [T/C] |
| rs7179347      | 76.0444          | 68630870          | G          | G          | [A/G] |
| rs2125998      | 76.0466          | 68631740          | G          | G          | [A/G] |
| rs7169899      | 76.0514          | 68633534          | G          | G          | [A/G] |
| rs8035990      | 76.052           | 68633773          | C          | C          | [T/C] |
| SNP15-68634536 | 76.054           | 68634536          | G          | G          | [A/G] |
| rs898582       | 76.0567          | 68635575          | C          | C          | [T/C] |
| rs1563894      | 76.0573          | 68635775          | A          | A          | [A/G] |
| SNP15-68636432 | 76.059           | 68636432          | A          | A          | [A/G] |
| rs3784344      | 76.06            | 68636798          | T          | T          | [T/C] |
| SNP15-68636849 | 76.0601          | 68636849          | C          | C          | [T/C] |
| SNP15-68638084 | 76.0633          | 68638084          | A          | A          | [A/G] |
| SNP15-68639206 | 76.0663          | 68639206          | A          | A          | [A/G] |
| SNP15-68639385 | 76.0667          | 68639385          | T          | T          | [T/C] |
| SNP15-68639606 | 76.0673          | 68639606          | A          | A          | [A/G] |
| rs8029838      | 76.0692          | 68640333          | C          | C          | [T/C] |
| SNP15-68640452 | 76.0695          | 68640452          | A          | A          | [A/G] |
| SNP15-68641741 | 76.073           | 68641741          | T          | T          | [T/C] |
| rs3784350      | 76.0738          | 68642047          | G          | G          | [A/G] |

| Name           | Genetic Position | Physical Position | Pedigree B | Pedigree C | SNP   |
|----------------|------------------|-------------------|------------|------------|-------|
| rs3784351      | 76.0742          | 68642220          | C          | C,T        | [T/C] |
| SNP15-68647590 | 76.0883          | 68647590          | A          | A          | [A/G] |
| rs12907890     | 76.0964          | 68649587          | T          | T          | [T/C] |
| SNP15-68651641 | 76.1062          | 68651641          | A          | A          | [A/G] |
| SNP15-68656035 | 76.127           | 68656035          | T          | T          | [T/G] |
| rs8040014      | 76.1276          | 68656162          | T          | T          | [T/C] |
| rs2306012      | 76.1314          | 68656960          | G          | G          | [A/G] |
| SNP15-68659450 | 76.1432          | 68659450          | T          | T          | [T/C] |
| rs2415009      | 76.1463          | 68660104          | T          | T          | [T/C] |
| SNP15-68660703 | 76.1492          | 68660703          | G          | G          | [A/G] |
| SNP15-68660823 | 76.1497          | 68660823          | G          | G          | [A/G] |
| SNP15-68661281 | 76.1519          | 68661281          | C          | T,C        | [T/C] |
| rs1460644      | 76.1557          | 68662081          | T          | T          | [T/C] |
| rs16951961     | 76.1599          | 68662976          | C          | C          | [T/C] |
| rs11072011     | 76.1614          | 68663283          | G          | G          | [A/G] |
| rs12595773     | 76.1696          | 68665017          | C          | C          | [T/C] |
| rs967565       | 76.1722          | 68665570          | C          | C          | [T/C] |
| SNP15-68666643 | 76.1773          | 68666643          | T          | T          | [T/C] |
| rs7183704      | 76.1876          | 68668816          | T          | T          | [T/G] |
| rs1460645      | 76.1896          | 68669239          | C          | C          | [T/C] |
| rs11858758     | 76.1955          | 68670469          | G          | G          | [A/G] |
| SNP15-68671867 | 76.2021          | 68671867          | T          | T          | [T/C] |
| SNP15-68673835 | 76.2114          | 68673835          | T          | T          | [T/C] |
| SNP15-68675236 | 76.2181          | 68675236          | G          | G          | [A/G] |
| rs4777048      | 76.2292          | 68677576          | T          | T          | [T/G] |
| SNP15-68678731 | 76.2346          | 68678731          | G          | G          | [A/G] |
| rs1075991      | 76.2368          | 68679181          | T          | T          | [T/C] |
| SNP15-68680258 | 76.2404          | 68680258          | A          | A          | [A/G] |
| SNP15-68680390 | 76.2405          | 68680390          | G          | G          | [A/G] |
| SNP15-68681554 | 76.2416          | 68681554          | A          | A          | [A/G] |
| rs11638575     | 76.2424          | 68682309          | T          | T          | [T/G] |
| SNP15-68682612 | 76.2427          | 68682612          | G          | G          | [A/G] |
| rs7173365      | 76.245           | 68684970          | C          | C          | [A/C] |
| SNP15-68685340 | 76.2453          | 68685340          | T          | T          | [T/A] |
| SNP15-68686333 | 76.2463          | 68686333          | G          | G          | [A/G] |
| SNP15-68686852 | 76.2468          | 68686852          | G          | G          | [A/G] |
| rs11629460     | 76.255           | 68695349          | C          | C          | [T/C] |
| rs11630897     | 76.2562          | 68696621          | G          | G          | [A/G] |
| rs11857615     | 76.2567          | 68697093          | T          | T          | [T/C] |
| rs12050670     | 76.2574          | 68697797          | A          | A          | [A/C] |
| rs9972560      | 76.2577          | 68698138          | C          | C          | [A/C] |
| rs11072020     | 76.2578          | 68698192          | C          | C          | [T/C] |
| rs7162189      | 76.2583          | 68698803          | A          | A          | [A/G] |
| rs11635082     | 76.2587          | 68699163          | C          | C          | [T/C] |
| rs17320635     | 76.2611          | 68701651          | A          | A          | [A/G] |
| rs7176145      | 76.2627          | 68703268          | T          | T          | [T/G] |
| SNP15-68704101 | 76.2635          | 68704101          | A          | A          | [A/G] |
| rs898577       | 76.265           | 68705697          | C          | C          | [T/C] |

| Name           | Genetic Position | Physical Position | Pedigree B | Pedigree C | SNP   |
|----------------|------------------|-------------------|------------|------------|-------|
| SNP15-68706284 | 76.2656          | 68706284          | A          | A          | [A/G] |
| SNP15-68708179 | 76.2674          | 68708179          | T          | T          | [T/C] |
| SNP15-68708629 | 76.2679          | 68708629          | A          | A          | [A/G] |
| SNP15-68708723 | 76.2679          | 68708723          | C          | C          | [T/C] |
| rs7169854      | 76.2688          | 68709584          | G          | G          | [A/G] |
| SNP15-68711017 | 76.2702          | 68711017          | G          | G          | [A/G] |
| rs8024010      | 76.2706          | 68711470          | T          | T          | [T/G] |
| SNP15-68711518 | 76.2707          | 68711518          | G          | G          | [A/G] |
| SNP15-68711649 | 76.2708          | 68711649          | G          | G          | [A/G] |
| SNP15-68712107 | 76.2712          | 68712107          | G          | G          | [A/G] |
| SNP15-68712460 | 76.2716          | 68712460          | G          | G          | [A/G] |
| SNP15-68713065 | 76.2722          | 68713065          | G          | G          | [A/G] |
| SNP15-68713617 | 76.2727          | 68713617          | G          | G          | [A/G] |
| SNP15-68713635 | 76.2727          | 68713635          | G          | G          | [A/G] |
| SNP15-68714245 | 76.2733          | 68714245          | C          | C          | [T/C] |
| SNP15-68715486 | 76.2745          | 68715486          | T          | T          | [T/C] |
| SNP15-68716567 | 76.2755          | 68716567          | G          | G          | [A/G] |
| rs8036698      | 76.2758          | 68716776          | T          | T          | [T/C] |
| SNP15-68717979 | 76.2769          | 68717979          | C          | C          | [T/C] |
| rs16952059     | 76.2769          | 68718000          | A          | A          | [A/G] |
| rs16952065     | 76.2779          | 68718987          | C          | C          | [T/C] |
| SNP15-68721538 | 76.2804          | 68721538          | G          | G          | [T/G] |
| SNP15-68722165 | 76.281           | 68722165          | T          | T          | [T/C] |
| SNP15-68722374 | 76.2812          | 68722374          | T          | T          | [T/C] |
| SNP15-68723348 | 76.2821          | 68723348          | C          | T          | [T/C] |
| rs895135       | 76.2825          | 68723712          | T          | G          | [T/G] |
| SNP15-68728094 | 76.2867          | 68728094          | T          | C          | [T/C] |
| SNP15-68728632 | 76.2872          | 68728632          | G          | T          | [T/G] |

The markers within *AAGAB* are displayed in green. All alleles where the haplotype of family B differs from that of family C are displayed in purple. At ambiguous loci which can't be phased using the available information, both alleles are indicated. The nucleotide and the physical position of the markers refer to the human genome assembly hg19. Markers which do not have an rs-number are named according to Illumina's chip annotation.
